# Supplementary material
Source: publisher figshare collection journal article supplement (https://sage.figshare.com/ndownloader/files/14379677)
Supplement: Supplementary file 1 [file 14379677]

## Supplement to ‘Merged block randomisation: a novel randomisation procedure for small clinical trials’.

### Additional simulation results

Abbreviations used in Figure legends: DA = deterministic allocation; PBR = permuted block randomisation; MBR = merged block randomisation; BUD = block urn design; MP = maximal procedure; BSD = big stick design; EBC = Efron’s biased coin design; CR = complete randomisation; MTI = maximum tolerated imbalance.

Figure S1: Setting 1 (single centre study). Proportion of suballocations (allocations created by stopping recruitment before the number  $n$  is reached) with an imbalance of at least 2, averaged over  $N = 1000$  simulation runs.

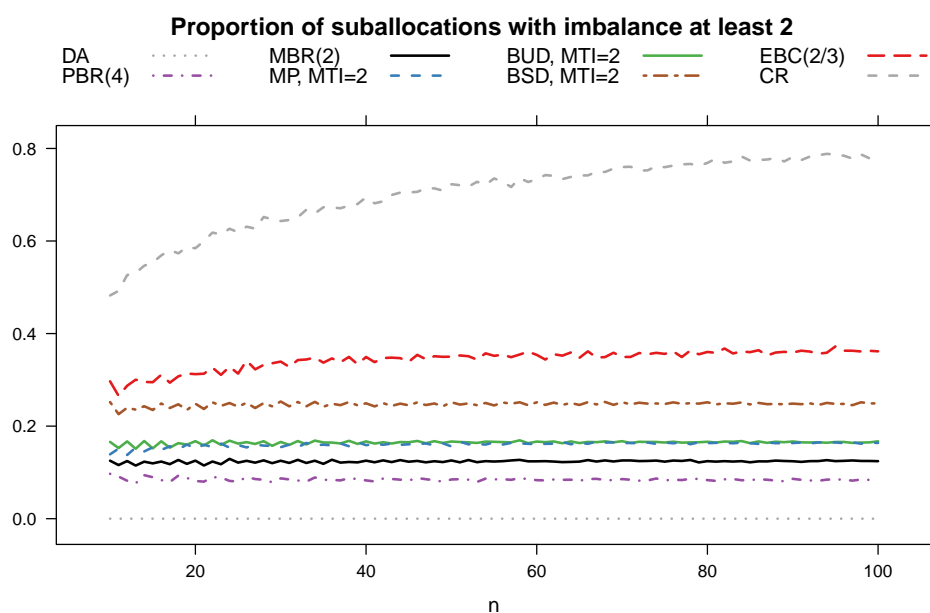

Figure S2: Setting 1 (single centre study). Average correct guess probability of the final allocation over  $N = 1000$  simulation runs.

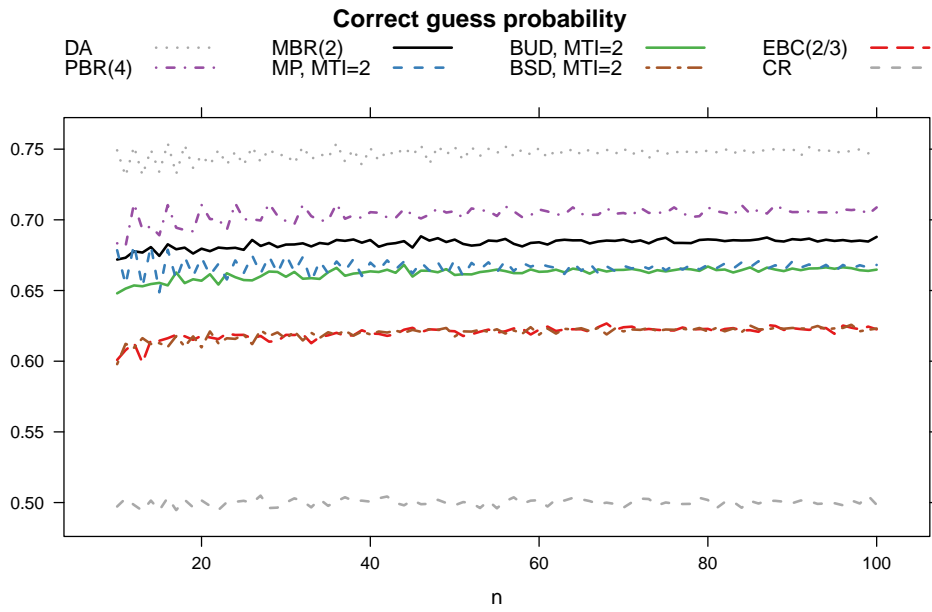

Figure S3: Setting 2 (multicentre study, 10 centres). Average imbalance of the final allocation (combining the ten strata) over  $N = 1000$  simulation runs.

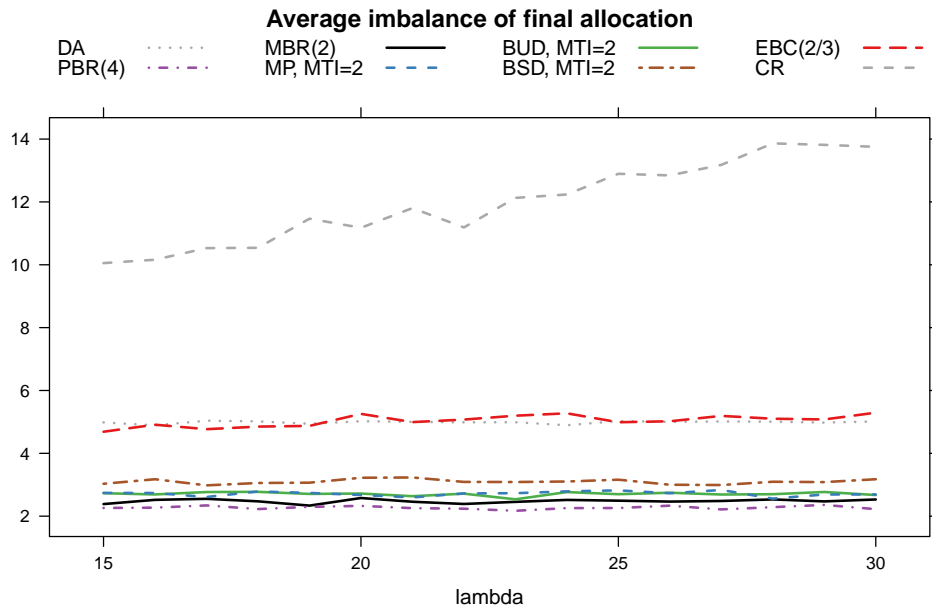

Figure S4: Setting 2 (multicentre study, 10 centres). Average correct guess probability, where the average is taken over the ten correct guess probabilities computed for each of the strata; then averaged over the  $N = 1000$  simulation runs.

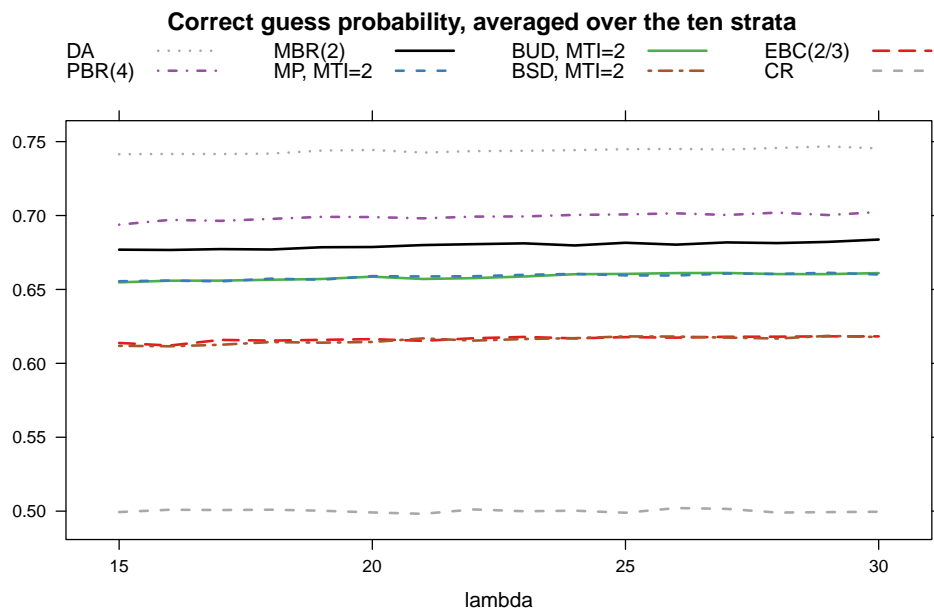

## Pseudo-code

---

**Algorithm 1** Pseudo-code for merged block randomisation

---

**Inputs:**

$n$ , the final sample size;

ratio, a vector with the desired allocation ratio, given in integers (e.g. [1 1] for 1:1 allocation).

*Initialization*

final  $\leftarrow$  empty vector of length  $n$

counter2  $\leftarrow$  0

*Create basis allocations*

$K \leftarrow$  sum of elements of ratio

basis1  $\leftarrow$  PBR( $K$ ) of length  $n$ , with blocks with the treatment assignment in the given ratio

basis2  $\leftarrow$  PBR( $K$ ) of length  $n$ , with blocks with the treatment assignment in the given ratio

use1or2  $\leftarrow$  vector of  $n$  fair coin flips, stored as 1's (heads) and 2's (tails)

*Merge*

**for**  $i$  from 1 to  $n$ :

**if** use1or2[ $i$ ] equals 1, **then** final[ $i$ ]  $\leftarrow$  basis1[ $i$  - counter2]

**else** {counter2  $\leftarrow$  (counter2 + 1) **and** final[ $i$ ]  $\leftarrow$  basis2[counter2]}

## R code

```
library(randomizeR)

BlockMergeGen <- function(n, ratio, labels){
  #n = sample size of final allocation
  #ratio = vector with desired allocation ratio, given in integers

  length.blocks <- sum(ratio)
  nr.basis.blocks <- ceiling(n/length.blocks)

  basis1 <- as.numeric(getRandList(genSeq(pbrPar(rep(length.blocks,
ceiling(n/length.blocks))), K=length(ratio), ratio = ratio, groups = labels))))[1:n]

  basis2 <- as.numeric(getRandList(genSeq(pbrPar(rep(length.blocks,
ceiling(n/length.blocks))), K=length(ratio), ratio = ratio, groups = labels))))[1:n]

  #now merge
  res <- rep(0, n)
  row1or2 <- sample(c(1, 2), size = n, prob = c(1/2, 1/2), replace = T)

  taken.from.2 <- 0

  for(i in 1:n){

    if(row1or2[i] == 1){res[i] <- basis1[i - taken.from.2]}

    if(row1or2[i] == 2){
      taken.from.2 <- (taken.from.2 + 1)
      res[i] <- basis2[taken.from.2]
    }
  }
  return(res)
}
```
